# Supplementary material
Source: PubMed Central journal article supplement (PMC6328766)
Supplement: AEM.02113-18-s0001.pdf [file AEM.02113-18-s0001.pdf]

1  
2  
3  
4  
5  
6  
7  
8  
9  
10

**SUPPLEMENTAL MATERIAL**

**Physiological, Genetic, and Transcriptomic Analysis of Alcohol-Induced Delay of Bacterial  
Death in *Escherichia coli***

Christina M. Ferraro & Steven E. Finkel

Molecular & Computational Biology Section, Department of Biological Sciences

University of Southern California

Los Angeles, CA

11 **Table S1 | Significantly upregulated genes one hour after ethanol addition**

| Gene        | Synonym(s)                  | Description                                                             | Fold Change | p-Value  |
|-------------|-----------------------------|-------------------------------------------------------------------------|-------------|----------|
| <i>glxR</i> | <i>glxB1, ybbQ</i>          | Tartronate semialdehyde reductase 2                                     | 36.25       | 7.10e-57 |
| <i>hyi</i>  | <i>ybbG, gip</i>            | Hydroxypyruvate isomerase                                               | 19.83       | 1.28e-36 |
| <i>gcl</i>  |                             | Glyoxylate carboligase                                                  | 12.05       | 2.88e-75 |
| <i>glcD</i> | <i>yghM, gox</i>            | Glycolate dehydrogenase, putative FAD-linked subunit                    | 11.46       | 2.14e-94 |
| <i>glcE</i> | <i>yghL, gox</i>            | Glycolate dehydrogenase, putative FAD-linked subunit                    | 9.17        | 6.83e-50 |
| <i>cysA</i> |                             | Sulfate/thiosulfate ABC transporter ATP binding subunit                 | 4.78        | 1.65e-34 |
| <i>cysI</i> |                             | Sulfite reductase, hemoprotein subunit                                  | 4.76        | 1.30e-20 |
| <i>frmR</i> | <i>yaiN</i>                 | DNA-binding transcriptional repressor                                   | 4.63        | 7.96e-49 |
| <i>cysJ</i> |                             | Sulfite reductase, flavoprotein subunit complex                         | 4.30        | 2.57e-30 |
| <i>asnA</i> |                             | Asparagine synthetase A                                                 | 3.73        | 3.83e-28 |
| <i>cysD</i> |                             | Sulfate adenylyltransferase subunit 2                                   | 3.71        | 9.94e-32 |
| <i>cysH</i> |                             | Phosphoadenosine phosphosulfate reductase                               | 3.69        | 3.82e-25 |
| <i>frmA</i> | <i>adhC</i>                 | S-(hydroxymethyl) glutathione dehydrogenase, formaldehyde dehydrogenase | 3.67        | 4.40e-23 |
| <i>allA</i> | <i>glxA2, ybbT</i>          | Ureidoglycolate lyase                                                   | 3.47        | 2.67e-07 |
| <i>yciW</i> |                             | Putative oxidoreductase                                                 | 3.42        | 9.62e-35 |
| <i>yeeD</i> |                             | Putative sulfurtransferase                                              | 3.11        | 3.65e-25 |
| <i>cysN</i> |                             | Sulfate adenylyltransferase subunit 1                                   | 3.10        | 3.22e-27 |
| <i>cysW</i> |                             | Sulfate/thiosulfate ABC transporter inner membrane subunit              | 3.08        | 5.32e-18 |
| <i>mgtA</i> | <i>atmA, corB, mgt, mtg</i> | Mg <sup>2+</sup> -importer P-type ATPase                                | 2.96        | 2.51e-24 |
| <i>cysU</i> |                             | Sulfate/thiosulfate ABC transporter inner membrane subunit              | 2.95        | 7.23e-13 |

12

13

14 **Table S2 | Significantly downregulated genes one hour after ethanol addition**

| Gene        | Synonym(s)              | Description                                               | Fold Change | p-Value  |
|-------------|-------------------------|-----------------------------------------------------------|-------------|----------|
| <i>kdpF</i> |                         | K <sup>+</sup> -transporting P-type ATPase subunit        | -51.91      | 0.000183 |
| <i>elbA</i> | <i>iraM, elb1, ycgW</i> | Anti-adaptor protein, inhibitor of $\sigma^S$ proteolysis | -4.42       | 0.00126  |
| <i>ygeL</i> |                         | Uncharacterized protein                                   | -4.30       | 0.0121   |
| <i>yadK</i> |                         | Putative fimbrial protein                                 | -4.18       | 0.000641 |
| <i>yehC</i> |                         | Putative fimbrial chaperone                               | -4.04       | 0.00234  |
| <i>yhhH</i> |                         | PF15631 family protein                                    | -3.92       | 0.00434  |
| <i>ydeM</i> |                         | Putative anaerobic sulfatase maturation enzyme            | -3.89       | 0.000370 |
| <i>ybcQ</i> |                         | DLP12 prophage, putative antitermination protein          | -3.86       | 0.00208  |
| <i>ygiZ</i> |                         | Conserved inner membrane protein                          | -3.62       | 0.00438  |
| <i>ypjC</i> |                         | DUF5507 domain-containing protein                         | -3.54       | 0.00779  |
| <i>ynfO</i> |                         | Qin prophage                                              | -3.53       | 0.00105  |
| <i>ydeQ</i> |                         | Putative fimbrial adhesin protein                         | -3.48       | 0.00419  |
| <i>ydcC</i> |                         | H repeat-associated putative transposase                  | -3.39       | 0.000994 |
| <i>bglH</i> | <i>yieC</i>             | Carbohydrate-specific outer membrane porin, cryptic       | -3.36       | 0.000515 |
| <i>yddL</i> |                         | Putative uncharacterized protein                          | -3.33       | 0.0185   |
| <i>yhaC</i> |                         | Uncharacterized protein                                   | -3.33       | 0.00305  |
| <i>yohH</i> | <i>mdtQ, yohG</i>       | Putative multidrug resistance outer membrane protein      | -3.31       | 0.00779  |
| <i>tdcR</i> |                         | DNA-binding transcriptional activator                     | -3.20       | 0.0191   |
| <i>ydeS</i> |                         | Putative fimbrial protein                                 | -3.20       | 0.0181   |
| <i>yiaB</i> |                         | Conserved inner membrane protein                          | -3.17       | 0.0113   |
| <i>ycaK</i> |                         | Putative NAD(P)H-dependent oxidoreductase                 | -3.16       | 0.00487  |
| <i>yddK</i> |                         | Leucine-rich repeat domain-containing protein             | -3.15       | 0.0180   |
| <i>agaB</i> | <i>yraD</i>             | Galactosamine-specific PTS enzyme IIB component           | -3.14       | 0.0156   |
| <i>ygcW</i> |                         | Putative deoxygluconate dehydrogenase                     | -3.14       | 0.0112   |
| <i>yaiS</i> |                         | Putative deacetylase                                      | -3.11       | 0.00508  |
| <i>ycjM</i> | <i>ggaP</i>             | Glucosylglycerate phosphorylase                           | -3.10       | 0.00389  |
| <i>yehS</i> |                         | Putative uncharacterized protein                          | -3.09       | 0.00479  |
| <i>essQ</i> | <i>ydfS</i>             | Qin prophage, putative S lysis protein                    | -3.08       | 0.00721  |

*Alcohol delays entry into death phase*

|             |                   |                                                                    |       |         |
|-------------|-------------------|--------------------------------------------------------------------|-------|---------|
| <i>fixX</i> | <i>yaaT</i>       | Putative ferredoxin                                                | -3.08 | 0.0171  |
| <i>yddJ</i> |                   | Uncharacterized protein                                            | -3.07 | 0.00495 |
| <i>yqeK</i> |                   | Uncharacterized protein                                            | -3.05 | 0.0105  |
| <i>yafT</i> |                   | Lipoprotein                                                        | -3.03 | 0.00859 |
| <i>yjfM</i> |                   | DUF1190 domain-containing protein                                  | -3.00 | 0.00819 |
| <i>ygeK</i> |                   | Putative DNA-binding transcriptional regulator                     | -2.98 | 0.0200  |
| <i>nrfB</i> | <i>yjcI</i>       | Periplasmic nitrite reductase penta-heme <i>c</i> -type cytochrome | -2.97 | 0.00347 |
| <i>yafU</i> |                   | Putative inner membrane protein                                    | -2.97 | 0.0108  |
| <i>ydfR</i> |                   | Qin prophage                                                       | -2.94 | 0.0183  |
| <i>ybcO</i> |                   | DLP12 prophage, putative nuclease                                  | -2.93 | 0.0362  |
| <i>yhcA</i> |                   | Putative fimbrial chaperone                                        | -2.92 | 0.0142  |
| <i>yhhZ</i> |                   | Putative endonuclease                                              | -2.91 | 0.00417 |
| <i>sfmF</i> | <i>ybcG</i>       | Putative fimbrial protein                                          | -2.89 | 0.0225  |
| <i>ybbD</i> |                   | Putative uncharacterized protein                                   | -2.89 | 0.00623 |
| <i>mokC</i> | <i>gefL</i>       | Regulatory protein                                                 | -2.88 | 0.00399 |
| <i>pin</i>  | <i>argU, dnaY</i> | tRNA-Arg(UCU)                                                      | -2.88 | 0.00784 |
| <i>yigE</i> |                   | DUF2233 domain-containing protein                                  | -2.85 | 0.00122 |
| <i>ynbB</i> |                   | Putative CDP-diglyceride synthase                                  | -2.84 | 0.00514 |
| <i>ydeT</i> | <i>fmlC</i>       | Fimbrial usher domain-containing protein                           | -2.83 | 0.00298 |

15

*Alcohol delays entry into death phase*

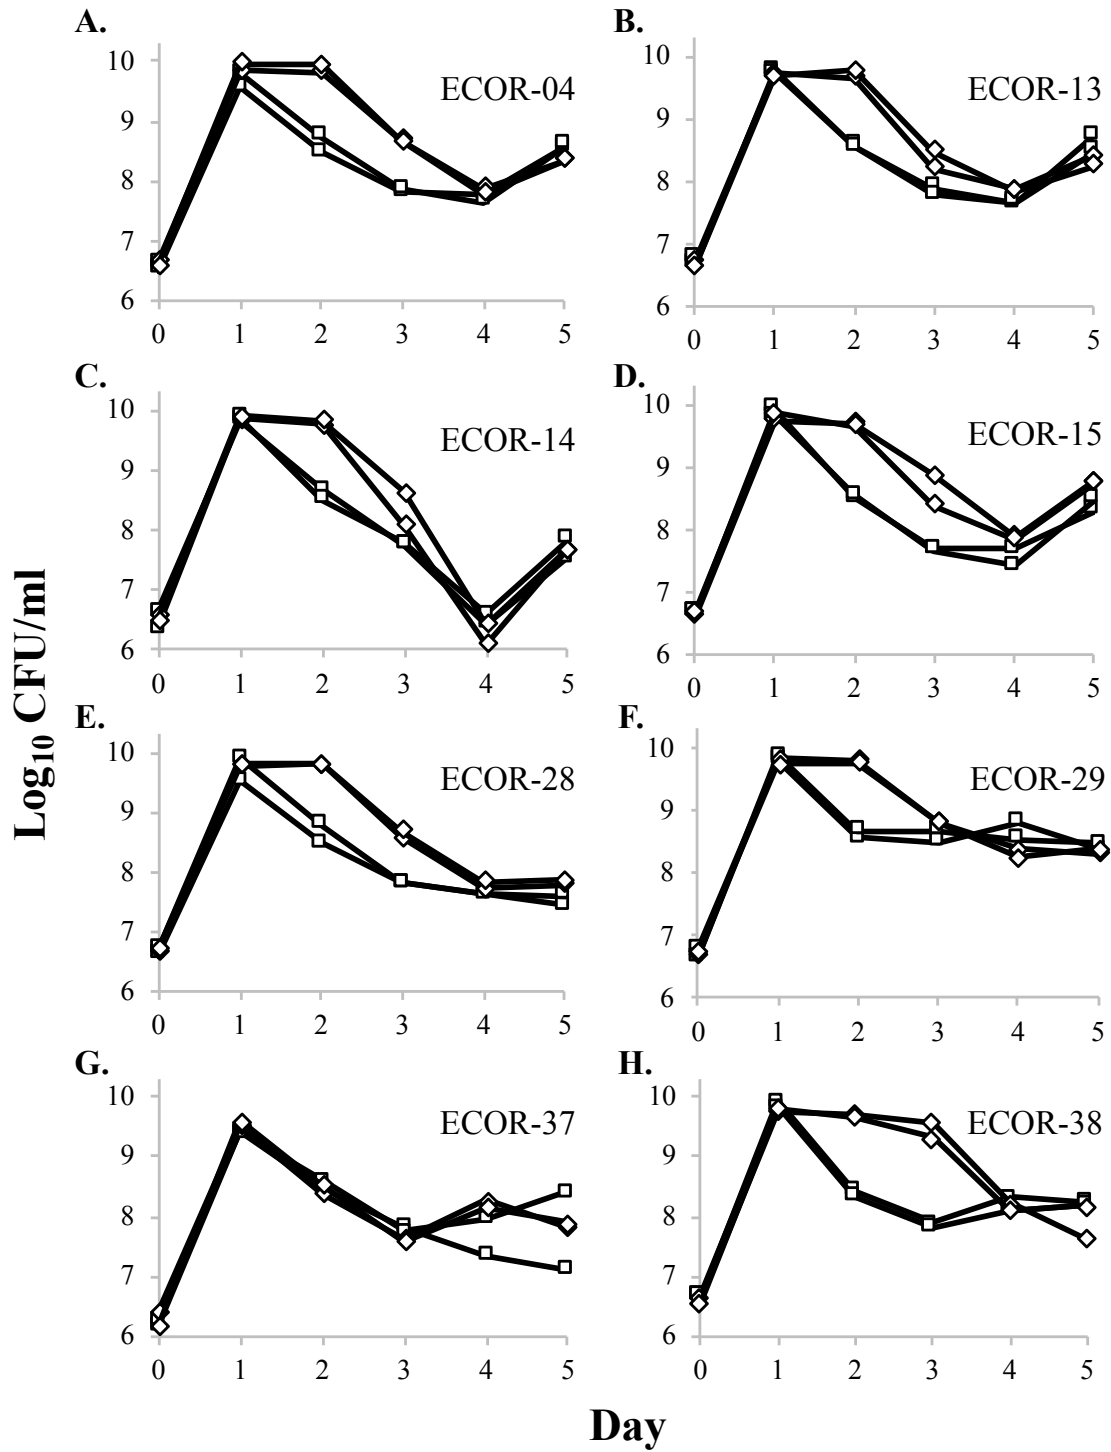

16  
17  
18  
19  
20  
21  
22

*Alcohol delays entry into death phase*

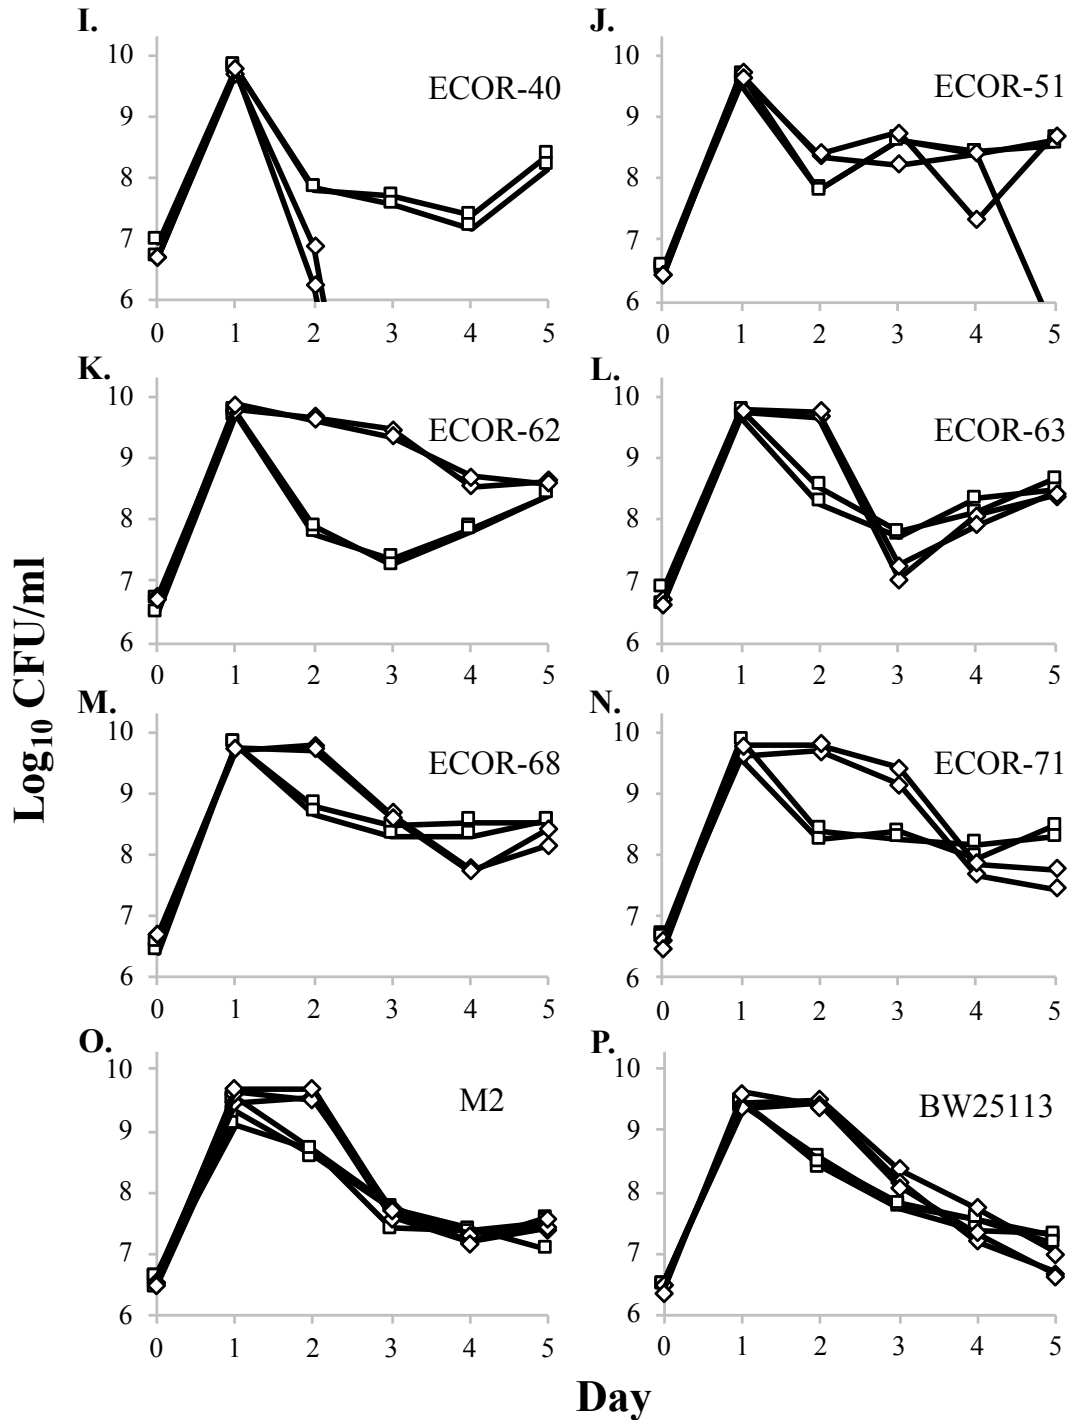

23  
 24 **Figure S1 | The majority of natural isolate and laboratory strains show the delayed death**  
 25 **effect induced by the addition of ethanol.** The effect was identified across multiple different  
 26 ECOR (1) strains and laboratory strains (2-4). Cultures were either left untreated (squares) or  
 27 treated (diamonds) on Day 1. (A) ECOR-04; (B) ECOR-13; (C) ECOR-14; (D) ECOR-15; (E)

*Alcohol delays entry into death phase*

28 ECOR-28; (F) ECOR-29; (G) ECOR-37; (H) ECOR-38; (I) ECOR-40; (J) ECOR-51; (K) ECOR-  
29 62; (L) ECOR-63; (M) ECOR-68; (N) ECOR-71; (O) M2; and (P) BW25113 strains.

30

*Alcohol delays entry into death phase*

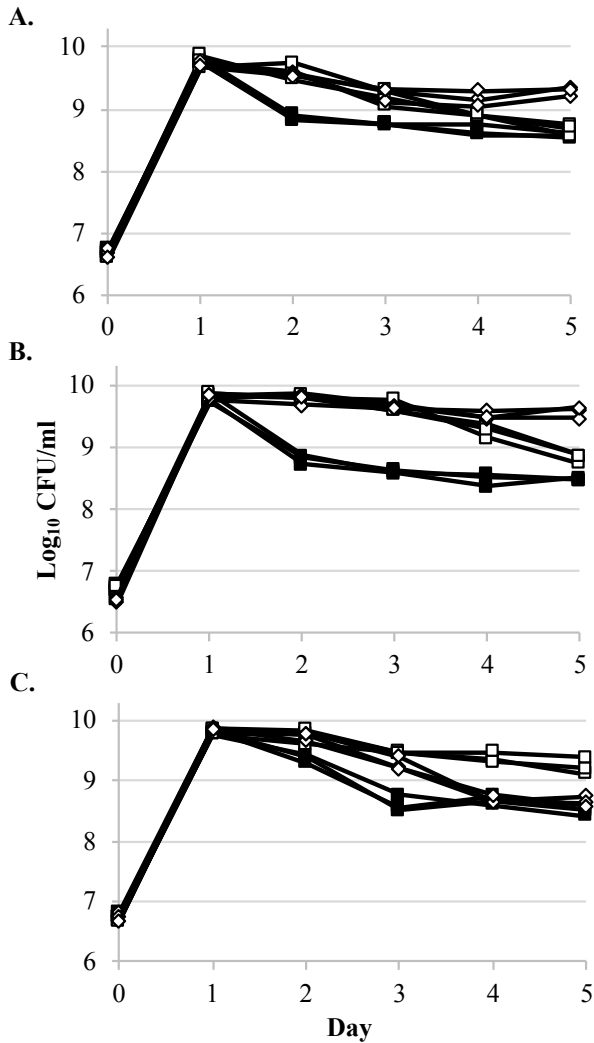

31

32 **Figure S2 | Single gene null strains corresponding to mutations in glycolate degradation path-**

33 **way genes have altered delayed death phenotype.** The RNA-sequencing analysis (Table 3; Ta-

34 ble S1; Table S2) showed significant upregulation of the *glxR*, *glcD*, and *gcl* genes. Here, we

35 restructured the data from Figure 7 to make each panel correspond to the growth physiology of

36 one of the null strains made. Untreated cultures (closed squares), 5 μl (~17.6 mM) ethanol (open

37 diamonds), and ~17.6 mM 1-butanol (open squares). (A) GlxR null populations; (B) GlcD null

38 populations; (C) Gcl null populations.

39



40 **REFERENCES**

- 41 1. Ingram LO, Vreeland NS. 1980. Differential effects of ethanol and hexanol on the  
42 *Escherichia coli* cell envelope. J Bacteriol 144:481-488.
- 43 2. Horinouchi T, Tamaoka K, Furusawa C, Ono N, Suzuki S, Hirasawa T, Yomo T, Shimizu  
44 H. 2010. Transcriptome analysis of parallel-evolved *Escherichia coli* strains under ethanol  
45 stress. BMC Genomics 11:579.
- 46 3. Ly HV, Longo ML. 2004. The influence of short-chain alcohols on interfacial tension,  
47 mechanical properties, area/molecule, and permeability of fluid lipid bilayers. Biophys J  
48 87:1013-1033.
- 49 4. Ingram LO. 1976. Adaption of membrane lipids to alcohols. J Bacteriol 125:670-678.
